# Supplementary material for: The Impact of Altruistic Behavior on Occupational Well-being Among Medical Professionals: The Mediating Role of Flow Experience
Source: Research Square preprint supplement (doi:10.21203/rs.3.rs-7598155/v1), 2025-10-23
Supplement: Supplementary file 1 [file 39a9221e4793d51ccfde4a48.docx]

Appendix I:

The occupational well-being scale for medical workers.

Instructions: How well do the descriptions in the table below match your situation? Please check the option that best fits your actual situation among the five choices: "Completely Disagree", "Mostly Disagree", "Uncertain", "Mostly Agree", "Completely Agree". Thank you for your cooperation, your responses are very important to our research.

|  | Completely Disagree | Mostly Disagree | Uncertain | Mostly Agree | Completely Agree |
| --- | --- | --- | --- | --- | --- |
| 1.Your physical condition is often in a sub-healthy state. |  |  |  |  |  |
| 2.Work has negatively impacted your physical health. |  |  |  |  |  |
| 3.Currently, your work pressure is high. |  |  |  |  |  |
| 4.Work exhausts you, even making you want to retire now. |  |  |  |  |  |
| 5.At work, you often feel depressed, emotionally low, and sometimes find it hard to control your temper. |  |  |  |  |  |
| 6.You feel work is very tiring, leaving no time or energy for things you enjoy. |  |  |  |  |  |
| 7.You feel your profession is sacred. |  |  |  |  |  |
| 8.You are satisfied with your current work state. |  |  |  |  |  |
| 9.You are satisfied with your social status. |  |  |  |  |  |
| 10.You like your current job. |  |  |  |  |  |
| 11.You feel a sense of achievement in the work you do. |  |  |  |  |  |
| 12.You believe your current job offers good promotion opportunities and development space. |  |  |  |  |  |
| 13.You think your unit has harmonious interpersonal relationships. |  |  |  |  |  |
| 14.Your family and friends support your work. |  |  |  |  |  |
| 15. Your leaders can support your work. |  |  |  |  |  |
| 16.Your colleagues can support your work. |  |  |  |  |  |
| 17.When you encounter problems at work, you can get help from your superiors. |  |  |  |  |  |
| 18.You are satisfied with your current income level. |  |  |  |  |  |
| 19.You believe your current work effort is proportional to your income. |  |  |  |  |  |
| 20.You are satisfied with the current hospital's welfare system. |  |  |  |  |  |
| 21.You are satisfied with the current doctor-patient relationship. |  |  |  |  |  |
| 22.You are satisfied with the office environment provided by the hospital. |  |  |  |  |  |
| 23.You are satisfied with the hospital's management and promotion systems. |  |  |  |  |  |
| 24.The hospital can provide you with good further training opportunities. |  |  |  |  |  |

Appendix II:

Altruistic Behavior Scale

The Altruistic Behavior Scale refers to the scales developed by Rushton et al. and Leung et al. to compile the questionnaire, consisting of three dimensions: attitude (3 items), behavior (4 items), and quality (3 items). Each item is measured using a Likert scale, scored positively from 1 to 5, ranging from "Never" to "Very Frequently".

1.When others need help, I will try my best.

1 - 2 - 3 - 4 - 5

2.Respect and consider others' feelings, be thoughtful of others.

1 - 2 - 3 - 4 - 5

3.Understand, empathize with, and care for others.

1 - 2 - 3 - 4 - 5

4.Provide services within one's capability for colleagues and patients.

1 - 2 - 3 - 4 - 5

5.Try to care more about the people around you.

1 - 2 - 3 - 4 - 5

6.Participate in volunteer or voluntary work.

1 - 2 - 3 - 4 - 5

7.Donate money to disadvantaged groups.

1 - 2 - 3 - 4 - 5

8.When helping others, do not consider personal gains and losses.

1 - 2 - 3 - 4 - 5

9.It is important to treat everyone sincerely.

1 - 2 - 3 - 4 - 5

10.Be brave enough to take responsibility under any circumstances.

1 - 2 - 3 - 4 - 5

Appendix III:

The flow state scale for medical personnel

Please answer the following questions based on your experience during the medical service activity you just completed. These questions relate to various thoughts and feelings you might have experienced during the medical service process you just finished. There are no right or wrong answers. Think about how you felt during the medical service process, then use the scale below to answer. Mark "√" under the number that best matches your experience for each question.

| Classification | | | | |
| --- | --- | --- | --- | --- |
| Strongly Disagree | Disagree | Neither agree nor disagree | Agree | Strongly Agree |
| 1 | 2 | 3 | 4 | 5 |

1. I was indeed very clear about how I was performing in the medical service.

1 - 2 - 3 - 4 - 5

1. My attention was completely focused on the current medical service work.

1 - 2 - 3 - 4 - 5

1. I was clearly aware of my medical service duties and goals.

1 - 2 - 3 - 4 - 5

1. I understood my performance in the medical service.

1 - 2 - 3 - 4 - 5

1. My medical service skills matched the high challenges of the current situation.

1 - 2 - 3 - 4 - 5

1. I felt I could (or was able to) completely control every aspect of the current medical service activity.

1 - 2 - 3 - 4 - 5

1. I loved this feeling of providing medical services and want to experience it again.

1 - 2 - 3 - 4 - 5

1. I felt my ability was sufficient to meet the high demands of the current medical service situation.

1 - 2 - 3 - 4 - 5

1. The medical service challenges and my professional skills were both at equally high levels.

1 - 2 - 3 - 4 - 5

1. During the medical service, time seemed to change.

1 - 2 - 3 - 4 - 5

1. During the current medical service activity, time passed differently than usual.

1 - 2 - 3 - 4 - 5

1. During the medical service, I lost the normal sense of time.

1 - 2 - 3 - 4 - 5

1. During the medical service process, I did not care how patients or colleagues viewed me.

1 - 2 - 3 - 4 - 5

1. During the medical service process, I was not concerned about how others might evaluate my medical service behavior.

1 - 2 - 3 - 4 - 5

1. During the medical service process, I was not worried about how patients or colleagues might view me.

1 - 2 - 3 - 4 - 5

(Note: The scale items are categorized by dimension, which are in order: Concentration and Directional Feedback, Intrinsic Empowerment and Control, Transformation of Time, Loss of Self-Consciousness.)

Appendix IV:

Development and validation of a flow state scale for medical personnel

1.Objects and Methods

1.1 Survey Objects

From March to May 2025,convenience sampling was used to conduct an online survey via Questionnaire Star, targeting medical personnel from different medical institutions, specialties, and professional title levels across the country. Survey subjects were mainly concentrated in Beijing and Fujian. Inclusion criteria: (1) medical personnel from different medical institutions, departments (including surgery, internal medicine, pediatrics, obstetrics and gynecology, traditional Chinese medicine, anesthesiology, etc.), and different professional title levels (including junior, intermediate, associate senior, and full senior); (2) Having rich clinical experience in the relevant specialty; (3) Voluntarily participating in this study. Questionnaire screening rules: ① Exclude questionnaires with completion time less than 180 seconds. ② Exclude responses with logical contradictions or extreme values. A total of 1360 questionnaires were collected, with 1240 valid questionnaires, yielding an effective response rate of 91.18%.

1.2 Research Methods

1.2.1 Literature Review and Item Construction

Computer searches were conducted in four major databases:CNKI, VIP, WanFang, and Web of Science. Search keywords were: ‘flow’, ‘flow state’ ‘flow theory’, ‘medical personnel’, ‘work immersion’, ‘flow state scale’. The search period ended on November 5, 2024. Through systematic literature research, and based on reference to the "Flow State Scale" compiled by Jackson et al. and the revised Chinese version of the "Flow State Scale-2" by Liu Weina, combined with the characteristics of medical personnel, the initial items for the Flow State Scale of medical personnel were drafted. The scale included 9 dimensions: Challenge-Skill Balance, Action-Awareness Merging, Clear Goals, Unambiguous Feedback, Concentration on the Task at Hand, Sense of Control, Loss of Self-Consciousness, Transformation of Time, and Autotelic Experience, totaling 33 items.

1.2.2 Delphi Expert Consultation Method

From May to July 2024,15 medical experts and senior medical personnel from different institutions in Beijing were invited via email for two rounds of expert consultation. The consultation questionnaire used a Likert 5-point scoring method, inviting experts to rate the importance, operability, and sensitivity of each item. The experts' fields involved Traditional Chinese Medicine (1 person), Nursing (1 person), Surgery (3 people), Internal Medicine (2 people), Obstetrics and Gynecology (1 person), Pediatrics (1 person), Psychology (3 people), Health Care Management (2 people), and other fields (1 person).

The effective recovery rate for both rounds of consultation was 100.00%. The threshold method was used for item screening, calculating the mean, full score ratio, and coefficient of variation for each item's importance score [1]. After the first round of expert consultation, the item "I don't care about my self-performance in medical services" was deleted. Additionally, based on expert opinions, textual revisions were made to 10 items, such as changing "My medical service skills matched the high demands of the current situation" to "My medical service skills matched the high challenges of the current situation." After the second round of expert consultation, combining statistical analysis results and expert opinions, 8 items were further revised, such as changing "I know how my medical service performance is" to "I understood my performance in the medical service."

The authority coefficient (Cr) for both rounds of expert consultation was 0.815. The Kendall's coefficient of concordance for the first round was 0.14 (P<0.001), rising to 0.22 (P<0.001) in the second round. Although this indicated a trend towards consensus among experts, the Kendall's W value did not reach its optimal standard. Based on the research of Sudip Bhandari [2] et al., the research team selected the 32 items that remained unchanged through both rounds of expert consultation and conducted Wilcoxon signed-rank tests to assess the stability between the two rounds of Delphi scores. Considering the potential risk of Type I error due to multiple comparisons, the Bonferroni correction [3] was further applied. The results showed that the P-values for the rank-sum tests of all items, and the significance levels after correction, indicated consistency between the two rounds of expert scoring, allowing the termination of a third round of expert consultation. Finally, an initial medical personnel Flow State Scale containing 9 dimensions and 32 items was formed.

1.2.3 Questionnaire Survey Method

The research used a questionnaire survey method,including a pre-survey and a formal survey stage. Electronic questionnaires were distributed via the Questionnaire Star platform, and the system automatically collected information from the research subjects, including basic information and medical personnel Flow State Scale assessment data. 70 questionnaires were collected in the pre-survey, and 1360 questionnaires were collected in the formal survey.

1.2.4 Statistical Methods

Pre-survey data were analyzed for reliability and factor analysis using SPSS 26.0. In the formal survey stage, SPSS 26.0 was used for descriptive analysis, item analysis, reliability analysis, and exploratory factor analysis (EFA), while confirmatory factor analysis (CFA) was performed using AMOS 26.0. The valid questionnaires from the formal survey were randomly split into sample one and sample two (each n=620). Sample one was used for item analysis and reliability and validity testing, during which the scale was optimized through item and dimension screening. Sample two was used to further validate the optimized scale, assess model fit, and obtain the final scale [4].

2 Results

2.1 Pre-survey Results

Before the formal survey,electronic questionnaires were distributed to 70 subjects for a small-scale pilot test to understand the questionnaire completion time, subjects' understanding of the scale content, etc. The pre-survey screening rules were the same as the formal survey. 65 valid questionnaires were collected, with an effective response rate of 92.86%. The overall Cronbach's α coefficient of the pre-survey scale was 0.96, and the KMO value was 0.84 (P<0.05). The subjects found it easy to understand, relatively comprehensive, and unambiguous [5].

2.2 Formal Survey Results

2.2.1 Basic Information of Survey Subjects

Among the 1240 valid questionnaires,the majority were female (860 people, 69.4%), with 376 males (30.3%); in terms of age, young and middle-aged were the majority: 287 people aged 25 and below (23.1%), 458 people aged 26-35 (36.9%), 290 people aged 36-45 (23.4%), and 205 people aged 46 and above (16.5%); in terms of education, those with bachelor's degrees were the most numerous (660 people, 53.2%); in terms of work experience, those with more than 10 years were the most numerous (589 people, 47.5%); in terms of medical institution level, workers from tertiary hospitals were the most numerous (758 people, 61.1%); in terms of profession, doctors were the most numerous (757 people, 61.0%); in terms of department distribution, the higher proportions were internal medicine (286 people, 23.1%), general practice (298 people, 24.0%), and other departments (245 people, 19.8%).

2.2.2 Item Analysis

Sample one was sorted by total score,selecting the top 27% high-scoring individuals as the high group and the bottom 27% low-scoring individuals as the low group. Independent samples t-tests were used to compare the scores of each item between the two groups. The statistical results showed that the score differences for all measurement items between the two groups reached statistically significant levels (P<0.05 and t-value > 3).

2.2.3 Reliability Analysis

Cronbach's α value was used as the standard for reliability judgment.The Cronbach's α coefficients for the 9 dimensions in sample one ranged from 0.777 to 0.889, and the overall Cronbach's α coefficient was 0.965 (Table 1). The corrected item-total correlation (CITC) values for each item were not less than 0.3, and the "Cronbach's Alpha if Item Deleted" for each item was lower than the overall Cronbach's α coefficient.

Table 1 Overall and Dimensional Reliability Analysis (Sample One)

| Dimension | Cronbach's α Coefficient | Number of Items |
| --- | --- | --- |
| Challenge-Skill Balance | 0.874 | 4 |
| Action-Awareness Merging | 0.777 | 3 |
| Clear Goals | 0.833 | 3 |
| Unambiguous Feedback | 0.884 | 4 |
| Concentration on the Task at Hand | 0.881 | 4 |
| Sense of Control | 0.850 | 3 |
| Loss of Self-Consciousness | 0.870 | 3 |
| Transformation of Time | 0.816 | 4 |
| Autotelic Experience | 0.889 | 4 |
| Overall | 0.965 | 32 |

2.2.4 Validity Analysis

Regarding content validity,this medical personnel Flow State Scale was adapted from mature scales combined with the characteristics of medical personnel, revised through two rigorous rounds of Delphi expert consultation, and adjusted via the pre-survey before the formal survey. It can be considered that the scale has good content validity [6]. For structural validity evaluation, this study split sample one and sample two in half, performing exploratory and confirmatory factor analysis respectively.

1. Exploratory Factor Analysis

KMO value greater than 0.7 usually indicates good scale validity [7]. In the initial analysis of this study, the KMO value was 0.956 > 0.7, and the Bartlett's sphericity test result was significant (P<0.001), confirming the data was suitable for factor analysis. As sample one was non-normally distributed data, and Principal Axis Factoring (PAF) is more suitable for exploring latent variables in psychological scale development [8]. Furthermore, theoretically, the dimensions of the flow scale are correlated [9]. Therefore, this study selected Principal Axis Factoring and Promax rotation, combined with eigenvalues and scree plots for factor extraction. Items with factor loadings less than 0.5 [10], or items with cross-loadings or unclear factor belonging were removed. The analysis process was rerun after each removal until a good result was obtained. Through multiple rounds of EFA, items Q1, Q2, Q11, Q20, Q24 were deleted, finally retaining 27 items, yielding 4 common factors, cumulatively explaining 63.29% of the total variance. The overall KMO value was 0.952, P<0.001. Factor 1 included 12 items, mainly composed of Clear Goals, Unambiguous Feedback, and Concentration on the Task at Hand from the initial scale, and was named "Concentration and Directional Feedback". Factor 2 included 8 items, mainly composed of Autotelic Experience, Challenge-Skill Balance, and Sense of Control from the initial scale, and was named "Intrinsic Empowerment and Control ". Factor 3 included 4 items, composed of the Transformation of Time from the initial scale, and was still named "Transformation of Time". Factor 4 included 3 items, composed of the Loss of Self-Consciousness from the initial scale, and was named "Loss of Self-Consciousness" [11]. (Note: Scale items are represented by the letter Q; the item order is the serial number, e.g., the first question is Q1.)

Table 2 Pattern Matrix (Sample One)

| Dimension | | Item number | | Factor | |
| --- | --- | --- | --- | --- | --- |
|  |  | 1 | 2 | 3 | 4 |
| Concentration and directional feedback | Q3 | 0.827 |  |  |  |
| Q4 | 0.896 |  |  |  |
| Q5 | 0.874 |  |  |  |
| Q6 | 0.695 |  |  |  |
| Q12 | 0.812 |  |  |  |
| Q13 | 0.833 |  |  |  |
| Q14 | 0.513 |  |  |  |
| Q21 | 0.701 |  |  |  |
| Q22 | 0.806 |  |  |  |
| Q23 | 0.647 |  |  |  |
| Q29 | 0.614 |  |  |  |
| Q30 | 0.640 |  |  |  |
| Intrinsic Empowerment and control | Q9 |  | 0.674 |  |  |
| Q10 |  | 0.620 |  |  |
| Q15 |  | 0.542 |  |  |
| Q18 |  | 0.935 |  |  |
| Q19 |  | 0.575 |  |  |
| Q27 |  | 0.972 |  |  |
| Q28 |  | 0.541 |  |  |
| Q32 |  | 0.574 |  |  |
| Transformation of time | Q8 |  |  | 0.821 |  |
| Q17 |  |  | 0.761 |  |
| Q26 |  |  | 0.669 |  |
| Q31 |  |  | 0.531 |  |
| Loss of self-consciousness | Q7 |  |  |  | 0.766 |
| Q16 |  |  |  | 0.843 |
| Q25 |  |  |  | 0.753 |

1. Confirmatory Factor Analysis

AMOS 26.0 was used for confirmatory factor analysis on the scale. After each model adjustment, the fit indices were checked to see if they met standards. If the indices indicated poor fit, further optimization was needed until the fit requirements were met. Finally, through CFA, items Q3, Q6, Q9, Q14, Q21, Q22, Q23, Q26, Q27, Q29, Q30, Q32 were deleted. The specific item numbers included in each dimension and the number of questions are shown in Table 3.

Table 3 Number of Items and Included Item Numbers for Each Dimension of the medical personnel Flow Scale

| Dimension | Final number of questions | item numbers |
| --- | --- | --- |
| concentration and directional feedback | 4 | Q4、Q5、Q12、Q13 |
| Intrinsic Empowerment and control | 5 | Q10、Q15、Q18、Q19、Q28 |
| Loss of self-consciousness | 3 | Q7、Q16、Q25 |
| transformation of time | 3 | Q8、Q17、Q31 |
| total | 15 |  |

Regarding structural validity, the results showed χ²/df = 2.596, RMSEA = 0.072, GFI = 0.916, AGFI = 0.880, CFI = 0.955, IFI = 0.955, TLI = 0.944, SRMR = 0.047, RMR = 0.047. Considering that AGFI greater than 0.85 is considered an acceptable fit, and greater than 0.90 indicates a good fit relative to the baseline model[12], and the robustness of SRMR for estimation methods makes it a preferred indicator for assessing model fit[13]. Although AGFI was slightly below the 0.90 standard for good fit, the SRMR (0.047) and the good performance of other indicators (RMSEA, CFI, TLI, etc.) collectively support a good model fit.

The assessment criteria for convergent validity were that the Average Variance Extracted (AVE) value for each dimension should be greater than 0.5, and the Composite Reliability (CR) value should be greater than 0.7. Meeting these conditions indicates good convergent validity of the scale[14]. Specific index values are shown in Table 4.

Table 4 Composite Reliability and AVE Value Analysis Results (Sample 1)

| Dimension | CR | AVE |
| --- | --- | --- |
| Concentration and directional feedback | 0.873 | 0.633 |
| Intrinsic Empowerment and control | 0.913 | 0.677 |
| Transformation of time | 0.813 | 0.592 |
| Loss of self-consciousness | 0.873 | 0.697 |

The results for discriminant validity showed that the square root of the AVE (minimum value) was greater than the maximum value of all correlation coefficients. Based on this, the scale can be considered to have good discriminant validity.

Table 5 Discriminant Validity (Sample 1)

|  | Loss of self-consciousness | Transformation of time | Intrinsic Empowerment and control | Concentration and directional feedback |
| --- | --- | --- | --- | --- |
| Loss of self-consciousness | 0.835 |  |  |  |
| Transformation of time | 0.460 | 0.770 |  |  |
| Intrinsic Empowerment and control | 0.737 | 0.542 | 0.823 |  |
| Concentration and directional feedback | 0.469 | 0.581 | 0.754 | 0.795 |

(This table shows the correlation matrix between the 4 factors with the square root of AVE on the diagonal)

2.2.5 Further Validation Using Sample 2

The reliability analysis results for Sample 2 are shown in Table 6. The Cronbach's α coefficients for all 4 dimensions were greater than 0.8, and the overall Cronbach's α coefficient was 0.909, indicating good reliability.

Table 6 Overall and Dimensional Reliability Analysis (Sample 2)

| Dimension | Cronbach's α Coefficient | Number of Items |
| --- | --- | --- |
| Concentration and directional feedback | 0.909 | 4 |
| Intrinsic Empowerment and control | 0.911 | 5 |
| Loss of self-consciousness | 0.867 | 3 |
| Transformation of time | 0.813 | 3 |
| Overall | 0.909 | 15 |

After adjusting the scale using Sample 1, to further test the stability of the scale's reliability, validity, and model fit, the study used Sample 2 to re-validate the revised scale. Exploratory factor analysis was performed on the split-half Sample 2. The overall KMO value was 0.915, Bartlett's sphericity test P<0.001, extracting 4 common factors, cumulatively explaining 68.14% of the total variance. Therefore, the scale is considered to have good validity.

Table 7 Pattern Matrix (Sample 2)

| Dimension | Item number | Factor | | | |
| --- | --- | --- | --- | --- | --- |
|  |  | 1 | 2 | 3 | 4 |
| Concentration and directional feedback | Q4 | 0.858 |  |  |  |
| Q5 | 0.812 |  |  |  |
| Q12 | 0.815 |  |  |  |
| Q13 | 0.776 |  |  |  |
| Intrinsic Empowerment and control | Q10 |  | 0.710 |  |  |
| Q15 |  | 0.563 |  |  |
| Q18 |  | 0.852 |  |  |
| Q19. |  | 0.898 |  |  |
| Q28 |  | 0.754 |  |  |
| Transformation of time | Q8 |  |  |  | 0.709 |
| Q17 |  |  |  | 0.725 |
| Q31 |  |  |  | 0.503 |
| Loss of self-consciousness | Q7 |  |  | 0.744 |  |
| Q16 |  |  | 0.919 |  |
| Q25 |  |  | 0.791 |  |

(Similar to Table 2, this shows the factor loadings for the 15 items on the 4 factors in Sample 2. Structure is indicated below.)

The confirmatory factor analysis results for Sample 2 showed: AVE values for all dimensions were >0.5, CR values were >0.7; and the square root of the AVE for each dimension was higher than its correlation coefficients with other dimensions. This indicates that the scale has good convergent validity and discriminant validity.

Table 8 Composite Reliability and AVE Value Analysis Results (Sample 2)

| Dimension | CR | AVE |
| --- | --- | --- |
| Concentration and directional feedback | 0.907 | 0.711 |
| Intrinsic Empowerment and control | 0.912 | 0.674 |
| Transformation of time | 0.859 | 0.671 |
| Loss of self-consciousness | 0.868 | 0.686 |

Table 9 Discriminant Validity (Sample 2)

|  | Loss of self-consciousness | Transformation of time | Intrinsic Empowerment and control | Concentration and directional feedback |
| --- | --- | --- | --- | --- |
| Loss of self-consciousness | 0.829 |  |  |  |
| Transformation of time | 0.540 | 0.819 |  |  |
| Intrinsic Empowerment and control | 0.604 | 0.690 | 0.821 |  |
| Concentration and directional feedback | 0.380 | 0.660 | 0.806 | 0.843 |

The model fit indices for Sample 2 were χ²/df = 2.661, RMSEA = 0.073, GFI = 0.915, AGFI = 0.878, CFI = 0.958, IFI = 0.959, TLI = 0.948, SRMR = 0.049, RMR = 0.037, indicating good model fit.

3. Scale Structure and Reliability-Validity Evaluation

This study, based on literature analysis and Delphi expert consultation, and referencing the "Flow State Scale" compiled by Jackson et al. and the revised Chinese version of the "Flow State Scale-2" by Liu Weina, combined with the characteristics of medical staff, employed rigorous statistical methods for reliability and validity testing. Finally obtained was a Medical Personnel Flow State Scale containing 4 factors (Concentration and Directional Feedback, Intrinsic Empowerment and Control , Loss of Self-Consciousness, and Transformation of Time) and 15 items. Confirmatory factor analysis results showed good model fit (χ²/df = 2.661, RMSEA = 0.073, GFI = 0.915, CFI = 0.958, SRMR = 0.049, RMR = 0.037). The overall Cronbach's α coefficient of the scale and its 4 dimensions ranged from 0.813 to 0.911. Convergent validity (AVE > 0.5, CR > 0.7) and discriminant validity (square root of AVE greater than the correlation coefficients between dimensions) indicators all met psychometric standards.

It is worth noting that the initial 9 theoretical dimensions in the exploratory factor analysis ultimately aggregated into 4 factors. The reason for this may be that the core characteristics of flow experience show stronger integration in the medical work context: ① The initial dimensions of "Clear Goals", "Unambiguous Feedback", and "Concentration on the Task at Hand" highly aggregated in the EFA, reflecting that for medical staff in high-pressure, goal-oriented medical tasks, clear goal awareness, unambiguous feedback, and highly concentrated attention are inseparable and mutually reinforcing holistic experiences, hence merged into the "Concentration and Directional Feedback" factor. ② The dimensions of "Challenge-Skill Balance", "Sense of Control", and "Autotelic Experience" were also closely related. When medical staff face highly challenging tasks that match their professional skills (Challenge-Skill Balance), perceive control over the operational process and environment (Sense of Control), and thereby generate strong pleasure and intrinsic drive (Autotelic Experience), these together constitute the core feeling of empowerment and positive control, hence merged into the "Intrinsic Empowerment and Control " factor. ③ Furthermore, the "Transformation of Time" and "Loss of Self-Consciousness" factors in the final scale were consistent with the theoretical conception, confirming the cross-situational stability of the flow experience.

References:

1.Wang, C. Z., & Si, Q. (2011). A Study of Data Statistical Processing Method of Delphi Method and Its Application. Journal of Inner Mongolia University Of Finance and Economics,2011,9 (04):92-96.

2.Bhandari, S., Wahl, B., Bennett, S., et al. (2020). Identifying core competencies for practicing public health professionals: results from a Delphi exercise in Uttar Pradesh, India. BMC Public Health, 20(1), 1737.

https://doi.org/10.1186/s12889-020-09711-4

1. Staffa, S. J., & Zurakowski, D. (2020). Strategies in adjusting for multiple comparisons: A primer for pediatric surgeons. Journal of Pediatric Surgery, 55(9), 1699–1705.

https://doi.org/10.1016/j.jpedsurg.2020.01.003

4.Zhang, Y. Q., & Li, J. (2021). Verification and reliability and validity analysis of medical staffs' intrinsic driving scale. Chinese Hospitals, 25(6), 54–58.

5.Jia, P. P., Wang, X. W., Li, M. H., et al. (2024). Development of a Usability Scale for Smart Hospital Platforms Based on QoE Theory. Chinese Hospital Management, 44(11), 70–73.

6.Song, B. B., Yao, D. M., & Guo, R. (2018). Patient medical care information adoption scale construction under the situation of China. Chinese Hospitals, 22(7), 18–21.

7.Zhang, W. T., & Dong, W. (2018). SPSS statistical analysis advanced tutorial (3rd ed.) . Higher Education Press.

8.Fabrigar, L. R., Wegener, D. T., MacCallum, R. C., & Strahan, E. J. (1999). Evaluating the use of exploratory factor analysis in psychological research. Psychological Methods, 4(3), 272–299.

https://doi.org/10.1037/1082-989X.4.3.272

9.Zhang, L. L.(2013). The study of flow experience of emergency department nurse worked in third-grade class-A hospital. Master’s thesis, Shanxi Medical University.

10.Costello, A. B., & Osborne, J. W. (2005). Best practices in exploratory factor analysis: Four recommendations for getting the most from your analysis. Practical Assessment, Research & Evaluation, 10(7), 1–9.

https://doi.org/10.7275/jyj1-4868

11.Fan, Z. G., Chen, L., Wang, X., et al. (2022). Development of the public stigma for disabled scale. Chinese Mental Health Journal, 36(11), 944–949.

12.Schermelleh-Engel, K., Moosbrugger, H., & Müller, H. (2003). Evaluating the Fit of Structural Equation Models: Tests of Significance and Descriptive Goodness-of-Fit Measures. Methods of Psychological Research, 8(2), 23–74..

13.Shi, D., & Maydeu-Olivares, A. (2020). The effect of estimation methods on SEM fit indices. Educational and Psychological Measurement, 80(3), 421–445. https://doi.org/10.1177/0013164419885164

14.Hair, J. F., Black, W. C., Babin, B. J., & Anderson, R. E. (2010). Multivariate data analysis: A global perspective (7th ed.). Pearson Education
